# Supplementary material for: White matter hyperintensity volume in pre-diabetes, diabetes and normoglycemia
Source: HighWire-hosted journal article supplement (doi:10.1136/bmjdrc-2020-002050), 2021-06-01
Supplement: bmjdrc-2020-002050supp001_data_supplement.pdf [file bmjdrc-2020-002050supp001_data_supplement.pdf]

# White matter hyperintensity volume in prediabetes, diabetes and normoglycemia

## Supplemental material

Sergio Grosu<sup>1</sup>, Roberto Lorbeer<sup>1</sup>, Felix Hartmann<sup>1</sup>, Susanne Rospleszcz<sup>3,4</sup>, Fabian Bamberg<sup>5</sup>, Christopher L. Schlett<sup>5</sup>, Franziska Galie<sup>1</sup>, Sonja Selder<sup>1</sup>, Sigrid Auweter<sup>1</sup>, Margit Heier<sup>3,6</sup>, Wolfgang Rathmann<sup>2,7</sup>, Katharina Mueller-Peltzer<sup>5</sup>, Karl-Heinz Ladwig<sup>3,8</sup>, Annette Peters<sup>3,4</sup>, Birgit Ertl-Wagner<sup>1,9</sup>, Sophia Stoecklein<sup>1</sup>

<sup>1</sup>Department of Radiology, University Hospital, LMU Munich, Munich, Germany

<sup>2</sup>Institute for Biometrics and Epidemiology, German Diabetes Center, Duesseldorf, Germany

<sup>3</sup>Institute of Epidemiology, Helmholtz Center Munich, German Research Center for Environmental Health, Neuherberg, Germany

<sup>4</sup>Department of Epidemiology, Institute for Medical Information Processing, Biometry and Epidemiology, Ludwig-Maximilians-Universität Munich, Munich, Germany

<sup>5</sup>Department of Diagnostic and Interventional Radiology, Medical Center–University of Freiburg, Faculty of Medicine, University of Freiburg, Freiburg, Germany

<sup>6</sup>KORA Study Centre, University Hospital of Augsburg, Augsburg, Germany

<sup>7</sup>German Center for Diabetes Research (DZD), Neuherberg, Germany

<sup>8</sup>Department of Psychosomatic Medicine and Psychotherapy, Hospital Rechts der Isar, Technical University Munich, Munich, Germany

<sup>9</sup>Department of Radiology, The Hospital for Sick Children, University of Toronto, Toronto, Canada

### Corresponding Authors:

Dr. med. Sergio Grosu, MD  
Department of Radiology, University Hospital, LMU Munich  
Marchioninistraße 15  
81377 Munich, Germany  
Telephone: +49 89 4400-73620  
Telefax: +49 89 4400-78832  
[Sergio.Grosu@med.uni-muenchen.de](mailto:Sergio.Grosu@med.uni-muenchen.de)

PD Dr. med. Sophia Stoecklein, MD  
Department of Radiology, University Hospital, LMU Munich  
Marchioninistraße 15  
81377 Munich, Germany  
Telephone: +49 89 4400-73620  
Telefax: +49 89 4400-78832  
[Sophia.Stoecklein@med.uni-muenchen.de](mailto:Sophia.Stoecklein@med.uni-muenchen.de)

## Supplementary Tables:

**Supplementary Table 1**

|            |          | Participants with prediabetes vs. normoglycemic control participants |         | Participants with diabetes vs. normoglycemic control participants |         | Participants with prediabetes vs. participants with diabetes |         |
|------------|----------|----------------------------------------------------------------------|---------|-------------------------------------------------------------------|---------|--------------------------------------------------------------|---------|
|            |          | IRR (95% CI)                                                         | p-value | IRR (95% CI)                                                      | p-value | IRR (95% CI)                                                 | p-value |
| WMH volume | <b>A</b> | 2.16 (1.49; 3.13)                                                    | <0.001  | 2.67 (1.71; 4.18)                                                 | <0.001  | 0.81 (0.49; 1.33)                                            | 0.396   |
|            | <b>B</b> | 1.84 (1.26; 2.67)                                                    | 0.001   | 1.96 (1.23; 3.12)                                                 | 0.005   | 0.94 (0.59; 1.5)                                             | 0.789   |
|            | <b>C</b> | 1.76 (1.20; 2.57)                                                    | 0.004   | 1.55 (0.95; 2.53)                                                 | 0.077   | 1.13 (0.71; 1.81)                                            | 0.605   |

**Supplementary Table 1:** Difference in WMH volume between participants with diabetes, participants with prediabetes and normoglycemic controls **in individuals with WMH (N=249)**. IRRs are from negative binomial regression models. **A:** unadjusted. **B:** adjusted for age, gender. **C:** adjusted for age, gender, hypertension, LDL-C, BMI, smoking, alcohol consumption.

**Supplementary Table 2**

|                   |          | Participants with prediabetes vs. normoglycemic control participants |         | Participants with diabetes vs. normoglycemic control participants |         | Participants with prediabetes vs. participants with diabetes |         |
|-------------------|----------|----------------------------------------------------------------------|---------|-------------------------------------------------------------------|---------|--------------------------------------------------------------|---------|
|                   |          | IRR (95% CI)                                                         | p-value | IRR (95% CI)                                                      | p-value | IRR (95% CI)                                                 | p-value |
| <b>WMH volume</b> | <b>A</b> | 1.45 (1.00; 2.09)                                                    | 0.047   | 2.39 (1.47; 3.90)                                                 | <0.001  | 0.60 (0.37; 0.98)                                            | 0.041   |
|                   | <b>B</b> | 1.20 (0.82; 1.75)                                                    | 0.351   | 1.59 (0.95; 2.66)                                                 | 0.075   | 0.75 (0.48; 1.18)                                            | 0.215   |
|                   | <b>C</b> | 1.19 (0.81; 1.76)                                                    | 0.379   | 1.38 (0.81; 2.36)                                                 | 0.242   | 0.86 (0.55; 1.36)                                            | 0.529   |

**Supplementary Table 2:** Association of diabetes status with WMH volume **applying the definition of prediabetes and diabetes of the American Diabetes Association instead of the definition of the World Health Organization / International Diabetes Federation.** IRRs are from zero-inflated negative binomial regression models. **A:** unadjusted. **B:** adjusted for age, gender. **C:** adjusted for age, gender, hypertension, LDL-C, BMI, smoking, alcohol consumption.

**Supplementary Table 3**

|            |   | 2-hour glucose (N=223) |         | Fasting glucose (N=249) |         | HbA1c (N=249)     |         |
|------------|---|------------------------|---------|-------------------------|---------|-------------------|---------|
|            |   | IRR (95% CI)           | p-value | IRR (95% CI)            | p-value | IRR (95% CI)      | p-value |
| WMH volume | A | 1.01 (1.01; 1.02)      | <0.001  | 1.00 (0.99; 1.01)       | 0.699   | 2.00 (1.38; 2.88) | <0.001  |
|            | B | 1.01 (1.00; 1.01)      | <0.001  | 1.00 (1; 1.01)          | 0.453   | 1.38 (1.05; 1.80) | 0.019   |
|            | C | 1.01 (1.00; 1.01)      | <0.001  | 1.00 (1; 1.01)          | 0.590   | 1.20 (0.98; 1.46) | 0.074   |

**Supplementary Table 3:** Association of 2-hour glucose, fasting glucose and HbA1c with WMH volume in individuals with WMH (N=249). Oral glucose tolerance test (OGTT). IRRs are from negative binomial regression models. **A:** unadjusted. **B:** adjusted for age, gender. **C:** adjusted for age, gender, hypertension, LDL-C, BMI, smoking, alcohol consumption.

**Supplementary Table 4**

|            |          | 2-hour glucose (N=354) |         | Fasting glucose (N=354) |         | HbA1c (N=354)     |         |
|------------|----------|------------------------|---------|-------------------------|---------|-------------------|---------|
|            |          | IRR (95% CI)           | p-value | IRR (95% CI)            | p-value | IRR (95% CI)      | p-value |
| WMH volume | <b>A</b> | 1.01 (1.01; 1.02)      | <0.001  | 1.00 (0.99; 1.02)       | 0.641   | 3.99 (2.64; 6.01) | <0.001  |
|            | <b>B</b> | 1.01 (1.00; 1.01)      | <0.001  | 1.00 (0.99; 1.01)       | 0.935   | 2.60 (1.73; 3.91) | <0.001  |
|            | <b>C</b> | 1.01 (1; 1.01)         | <0.001  | 1.00 (0.99; 1.02)       | 0.886   | 1.94 (1.22; 3.07) | 0.005   |

**Supplementary Table 4:** Association of 2-hour glucose, fasting glucose and HbA1c with WMH volume **in individuals who have received an OGTT (N=354)**. Oral glucose tolerance test (OGTT). IRRs are from zero-inflated negative binomial regression models. **A:** unadjusted. **B:** adjusted for age, gender. **C:** adjusted for age, gender, hypertension, LDL-C, BMI, smoking, alcohol consumption.

**Supplementary Table 5**

|            |   | Isolated IGT (N=44) |         | Isolated IFG (N=37) |         | Combined IGT/IFG (N=17) |         |
|------------|---|---------------------|---------|---------------------|---------|-------------------------|---------|
|            |   | IRR (95% CI)        | p-value | IRR (95% CI)        | p-value | IRR (95% CI)            | p-value |
| WMH volume | A | 2.63 (1.6; 4.34)    | <0.001  | 1.36 (0.79; 2.36)   | 0.269   | 2.51 (1.28; 4.92)       | 0.007   |
|            | B | 2.67 (1.62; 4.38)   | <0.001  | 1.49 (0.88; 2.52)   | 0.134   | 1.54 (0.81; 2.91)       | 0.188   |
|            | C | 2.59 (1.56; 4.32)   | <0.001  | 1.69 (0.99; 2.87)   | 0.052   | 1.87 (0.96; 3.64)       | 0.064   |

**Supplementary Table 5:** Association of isolated IGT, isolated IFG and combined IGT/IFG with WMH volume. Impaired glucose tolerance (IGT). Impaired fasting glucose (IFG). IRRs are from zero-inflated negative binomial regression models. **A:** unadjusted. **B:** adjusted for age, gender. **C:** adjusted for age, gender, hypertension, LDL-C, BMI, smoking, alcohol consumption.

**Supplementary Table 6**

|                                          | <b>Isolated IGT<br/>(N=44)</b> | <b>Isolated IFG<br/>(N=37)</b> | <b>Combined<br/>IGT/IFG<br/>(N=17)</b> | <b>p-value*</b> |
|------------------------------------------|--------------------------------|--------------------------------|----------------------------------------|-----------------|
| <b>WMH</b>                               | 30 (68.2%)                     | 24 (64.9%)                     | 15 (88.2%)                             | 0.198           |
| <b>WMH volume (mm<sup>3</sup>)</b>       | 3064.6<br>(±6732.5)            | 1511.9<br>(±3642.6)            | 3780.9<br>(±7537.7)                    | 0.338           |
| <b>Age (years)</b>                       | 58.3 (±9.1)                    | 57.4 (±8.6)                    | 61.1 (±8.6)                            | 0.352           |
| <b>Male gender</b>                       | 29 (65.9%)                     | 24 (64.9%)                     | 9 (52.9%)                              | 0.621           |
| <b>BMI (kg/m<sup>2</sup>)</b>            | 30.9 (±4.8)                    | 29.5 (±4.7)                    | 31.2 (±4.4)                            | 0.288           |
| <b>Hypertension<sup>o</sup></b>          | 18 (40.9%)                     | 16 (43.2%)                     | 10 (58.8%)                             | 0.437           |
| <b>Systolic BP (mmHg)</b>                | 125.3 (±16.5)                  | 120.1 (±13.8)                  | 128.8 (±11.8)                          | 0.101           |
| <b>Diastolic BP (mmHg)</b>               | 79.1 (±9.2)                    | 75.2 (±10.2)                   | 79.2 (±9.2)                            | 0.149           |
| <b>Total cholesterol (mg/dl)</b>         | 226.1 (±32.4)                  | 215.7 (±29.9)                  | 229.9 (±28.3)                          | 0.189           |
| <b>HDL (mg/dl)</b>                       | 56.3 (±12.4)                   | 61.9 (±16.2)                   | 57.7 (±12.2)                           | 0.189           |
| <b>LDL-C (mg/dl)</b>                     | 148.7 (±27.5)                  | 135.3 (±31.6)                  | 150 (±26.3)                            | 0.078           |
| <b>Triglycerides (mg/dl)</b>             | 158.8 (±71.2)                  | 132.6 (±67.2)                  | 174.1 (±123)                           | 0.163           |
| <b>HbA1c (%)</b>                         | 5.51 (±0.32)                   | 5.52 (±0.28)                   | 5.81 (±0.38)                           | 0.003           |
| <b>Fasting serum glucose (mg/dl)</b>     | 97.4 (±7.3)                    | 114.4 (±3.6)                   | 114.6 (±4.2)                           | <0.001          |
| <b>Glucose after 2-hour OGTT (mg/dl)</b> | 157.7 (±14.8)                  | 108.8 (±18.9)                  | 164.8 (±16)                            | <0.001          |

**Supplementary Table 6:** Characteristics of the study population stratified by IGT and IFG. Impaired glucose tolerance (IGT). Impaired fasting glucose (IFG). Data are means and standard deviations for continuous variables and counts and percentages for categorical variables. \*p-values are from one-way ANOVA and  $\chi^2$ -test, respectively. <sup>o</sup>Hypertension was defined as systolic blood pressure  $\geq 140$  mmHg, diastolic blood pressure  $\geq 90$  mmHg and/or use of antihypertensive medication, given that the individuals were aware of being hypertensive.

**Supplementary Figures:****Supplementary Figure 1**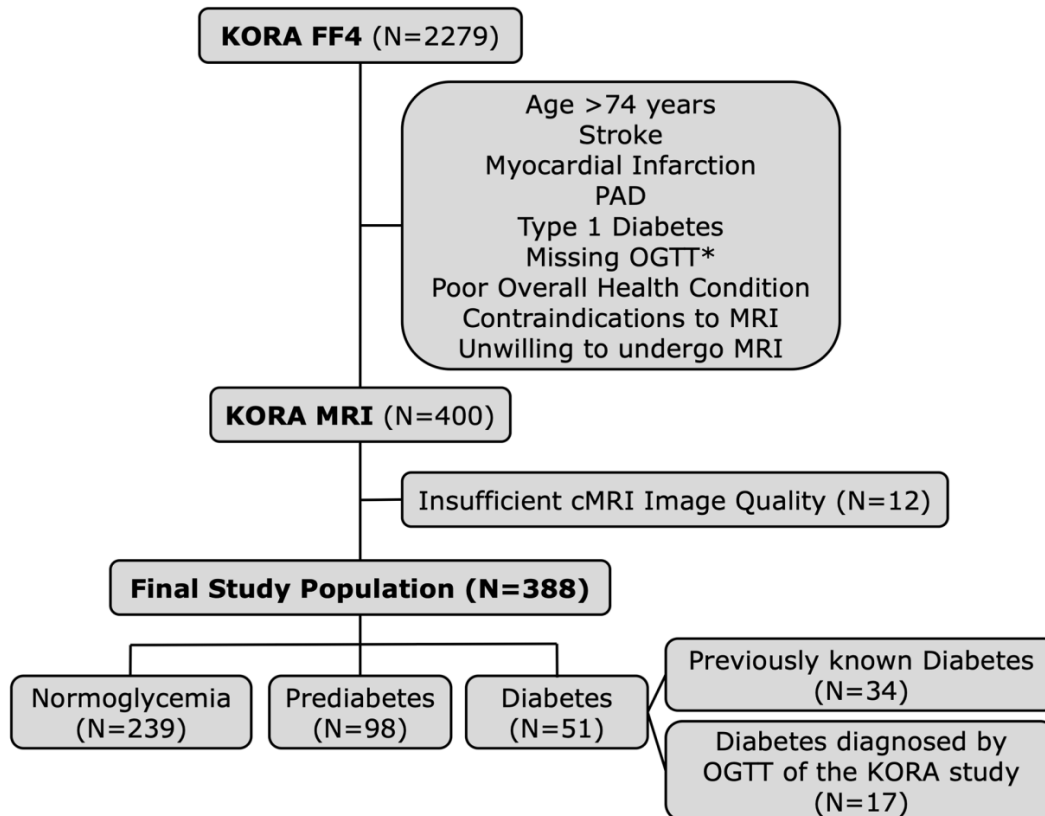

**Supplementary Figure 1:** Participant flow diagram. \*Unless type 2 diabetes was diagnosed by a physician before entering the KORA FF4 study (N=34).
